# Supplementary material
Source: publisher figshare collection journal article supplement (https://geolsoc.figshare.com/articles/dataset/_/3453959)

Clast-rich sandy diamicton lithofacies

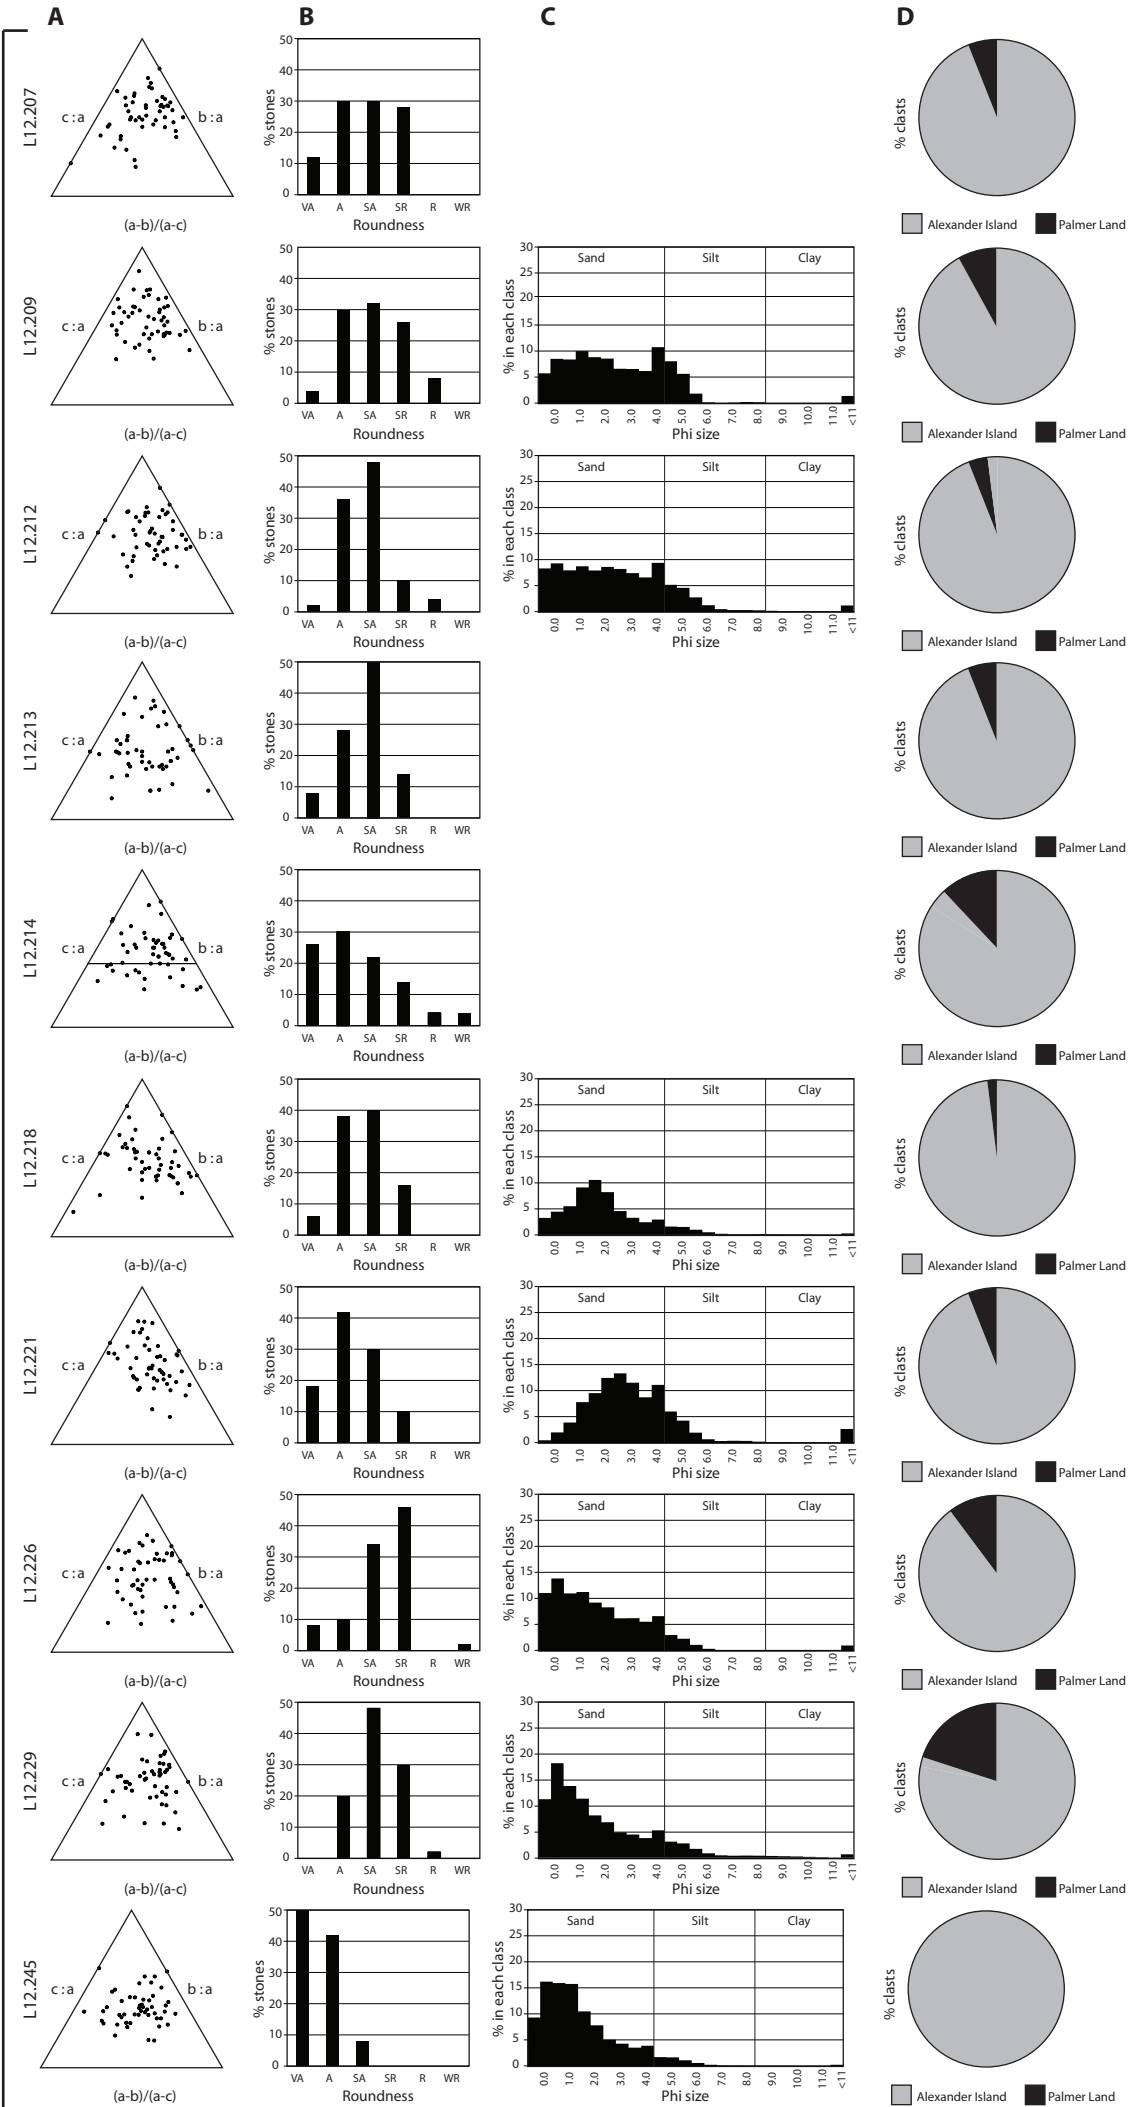

Supplement: Supplementary file 1 [file 1]

**A**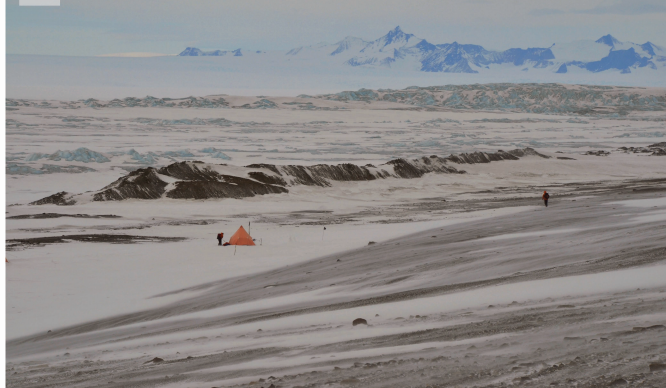**B**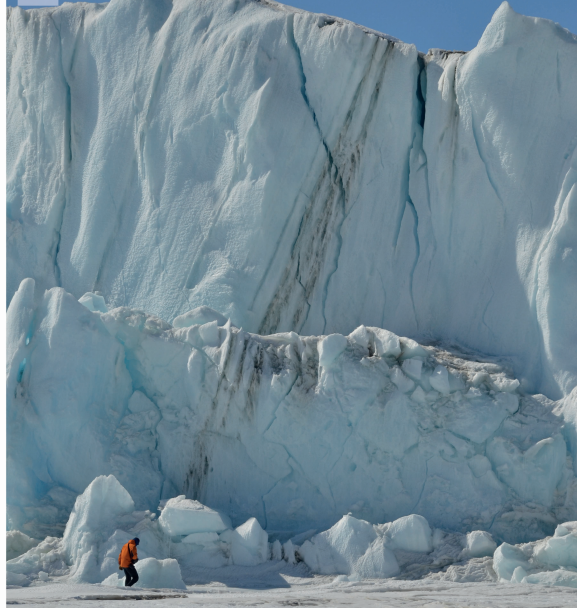**C**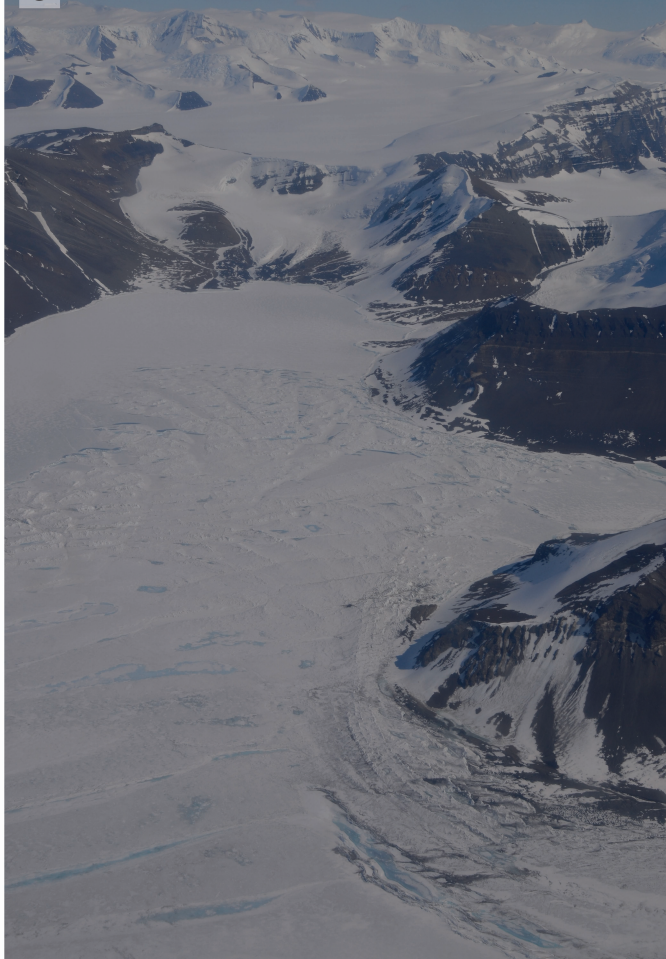**D**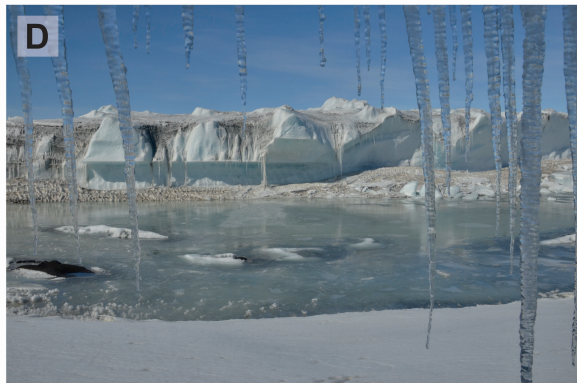**E**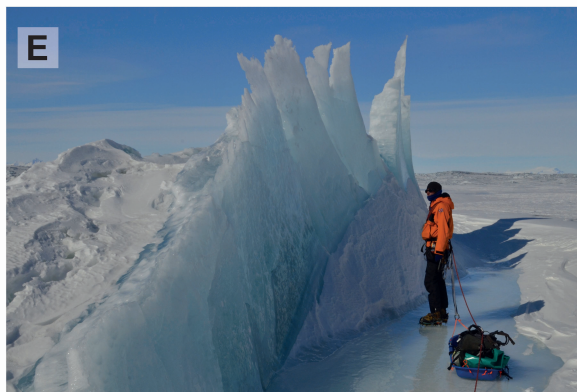

Supplement: Supplementary file 2 [file 1]

Sandy gravel lithofacies

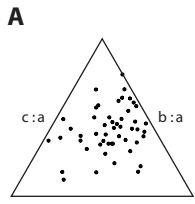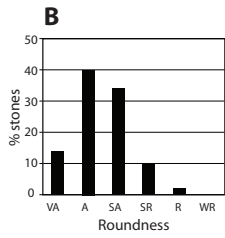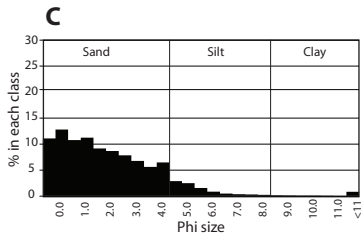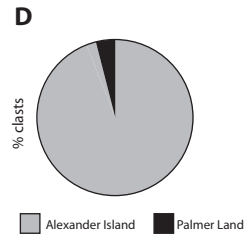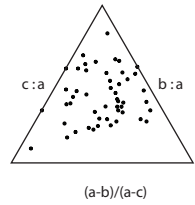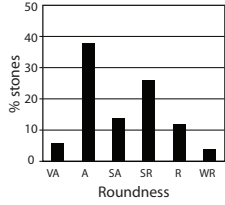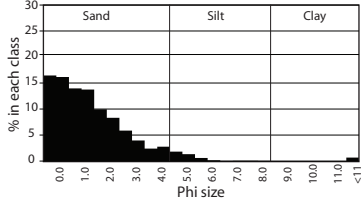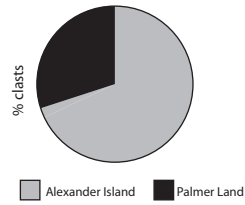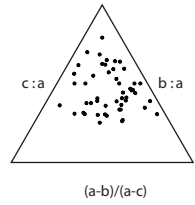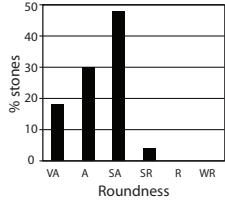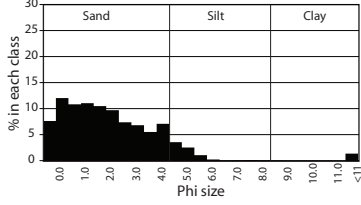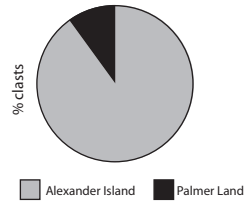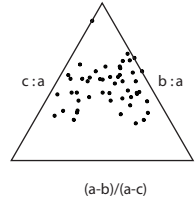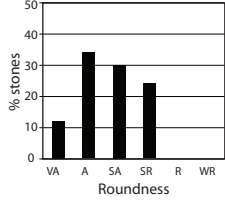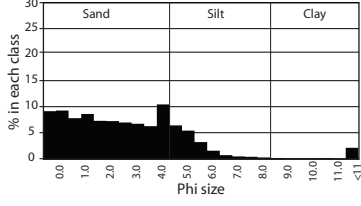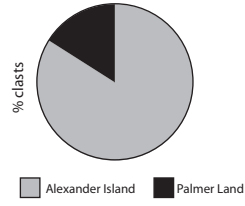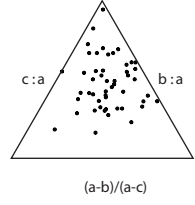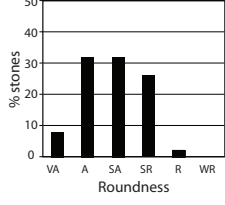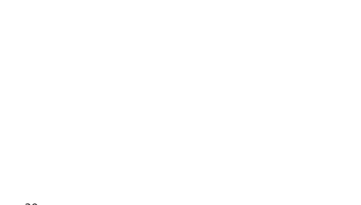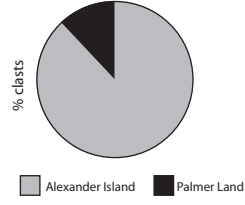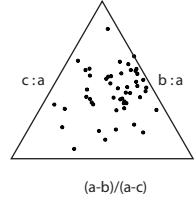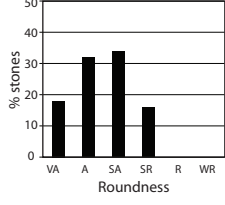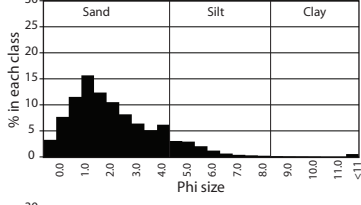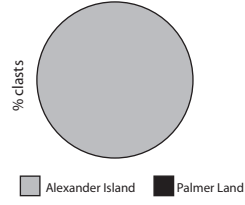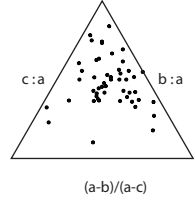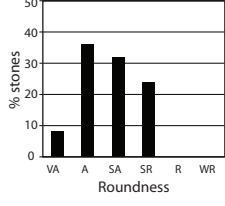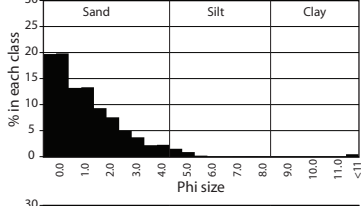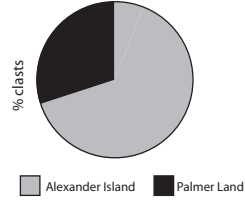

Sand lithofacies

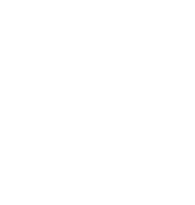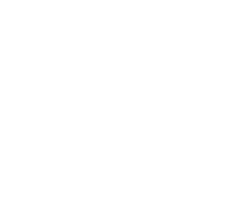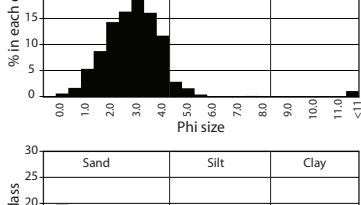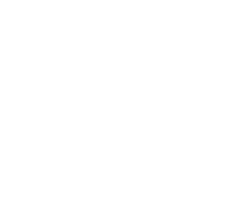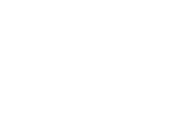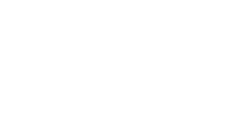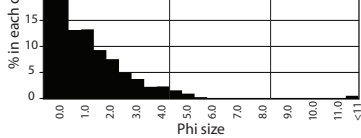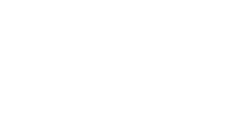

Supplement: Supplementary file 3 [file 1]

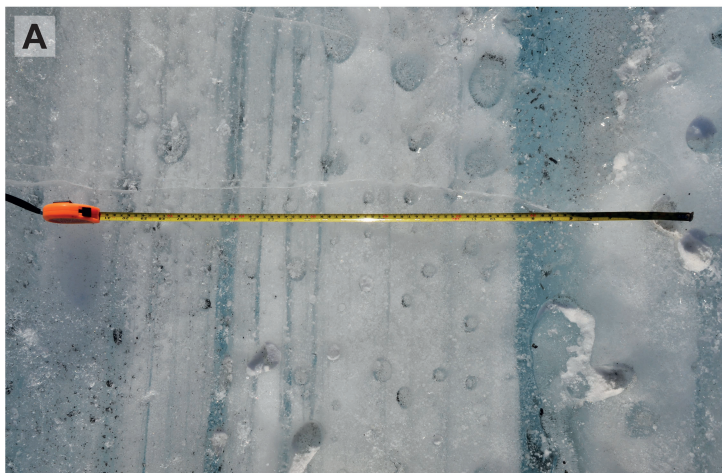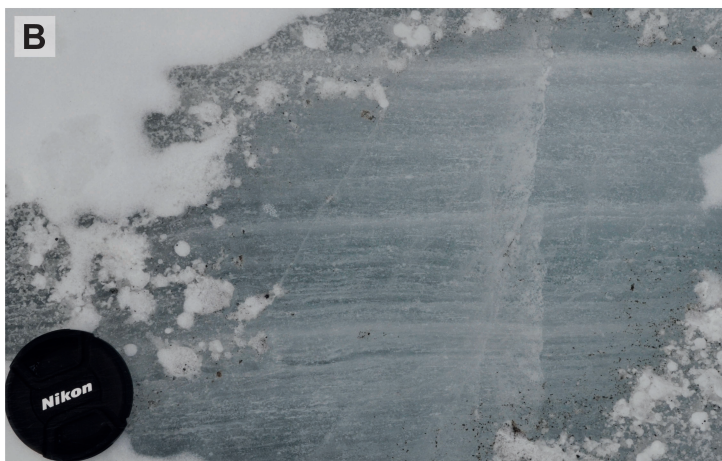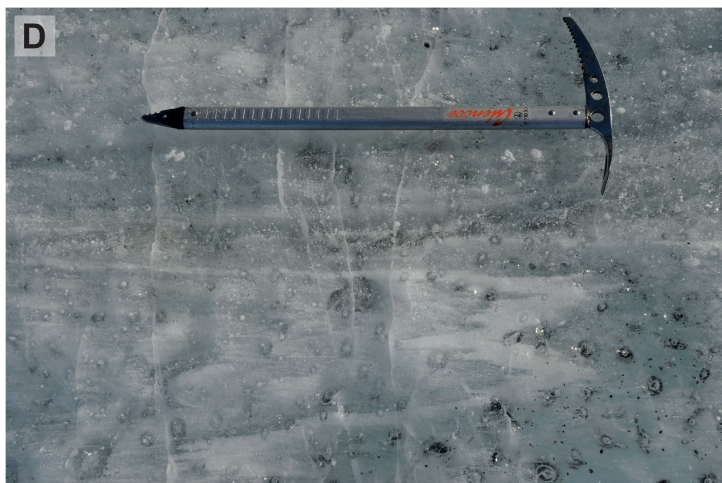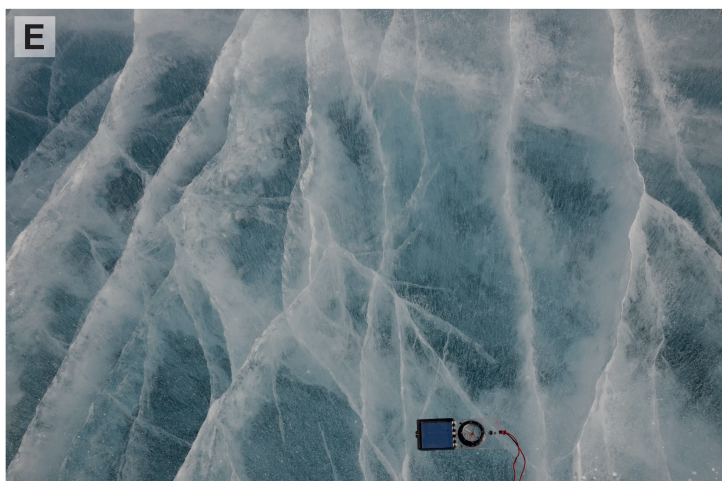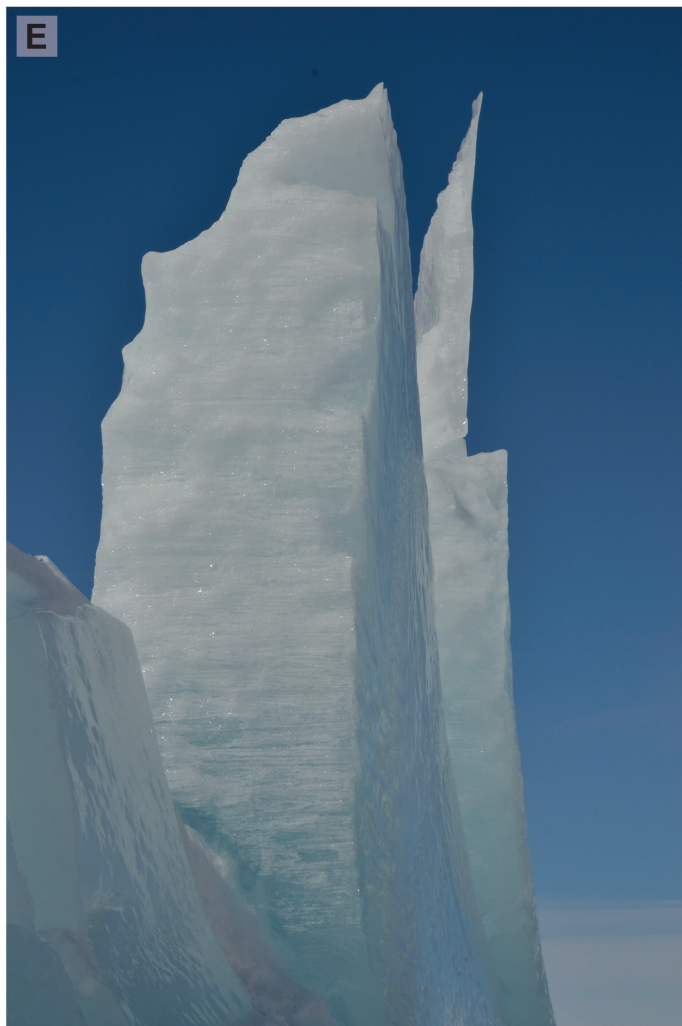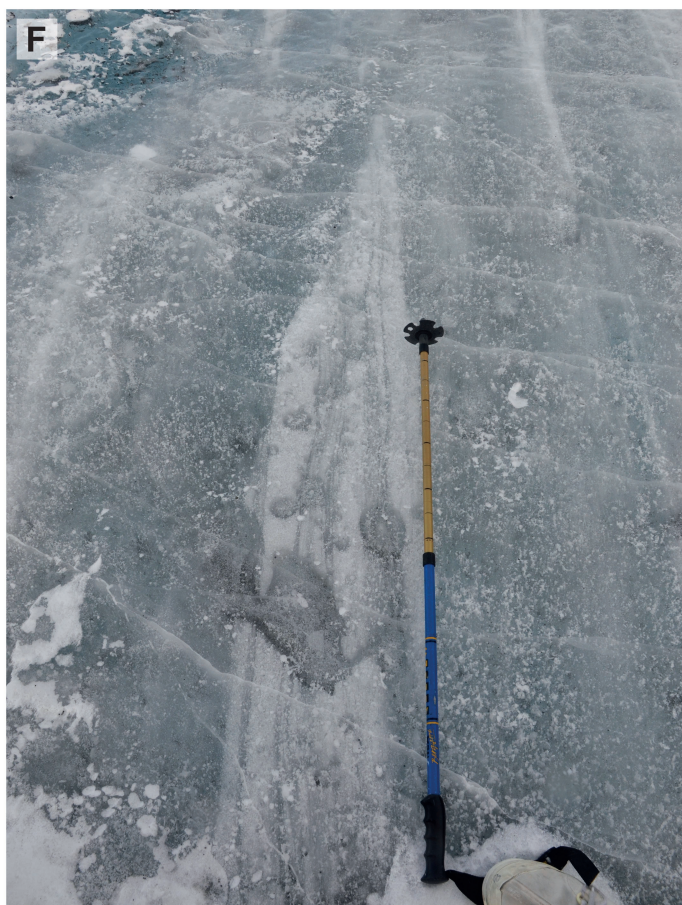

Supplement: Supplementary file 4 [file 1]

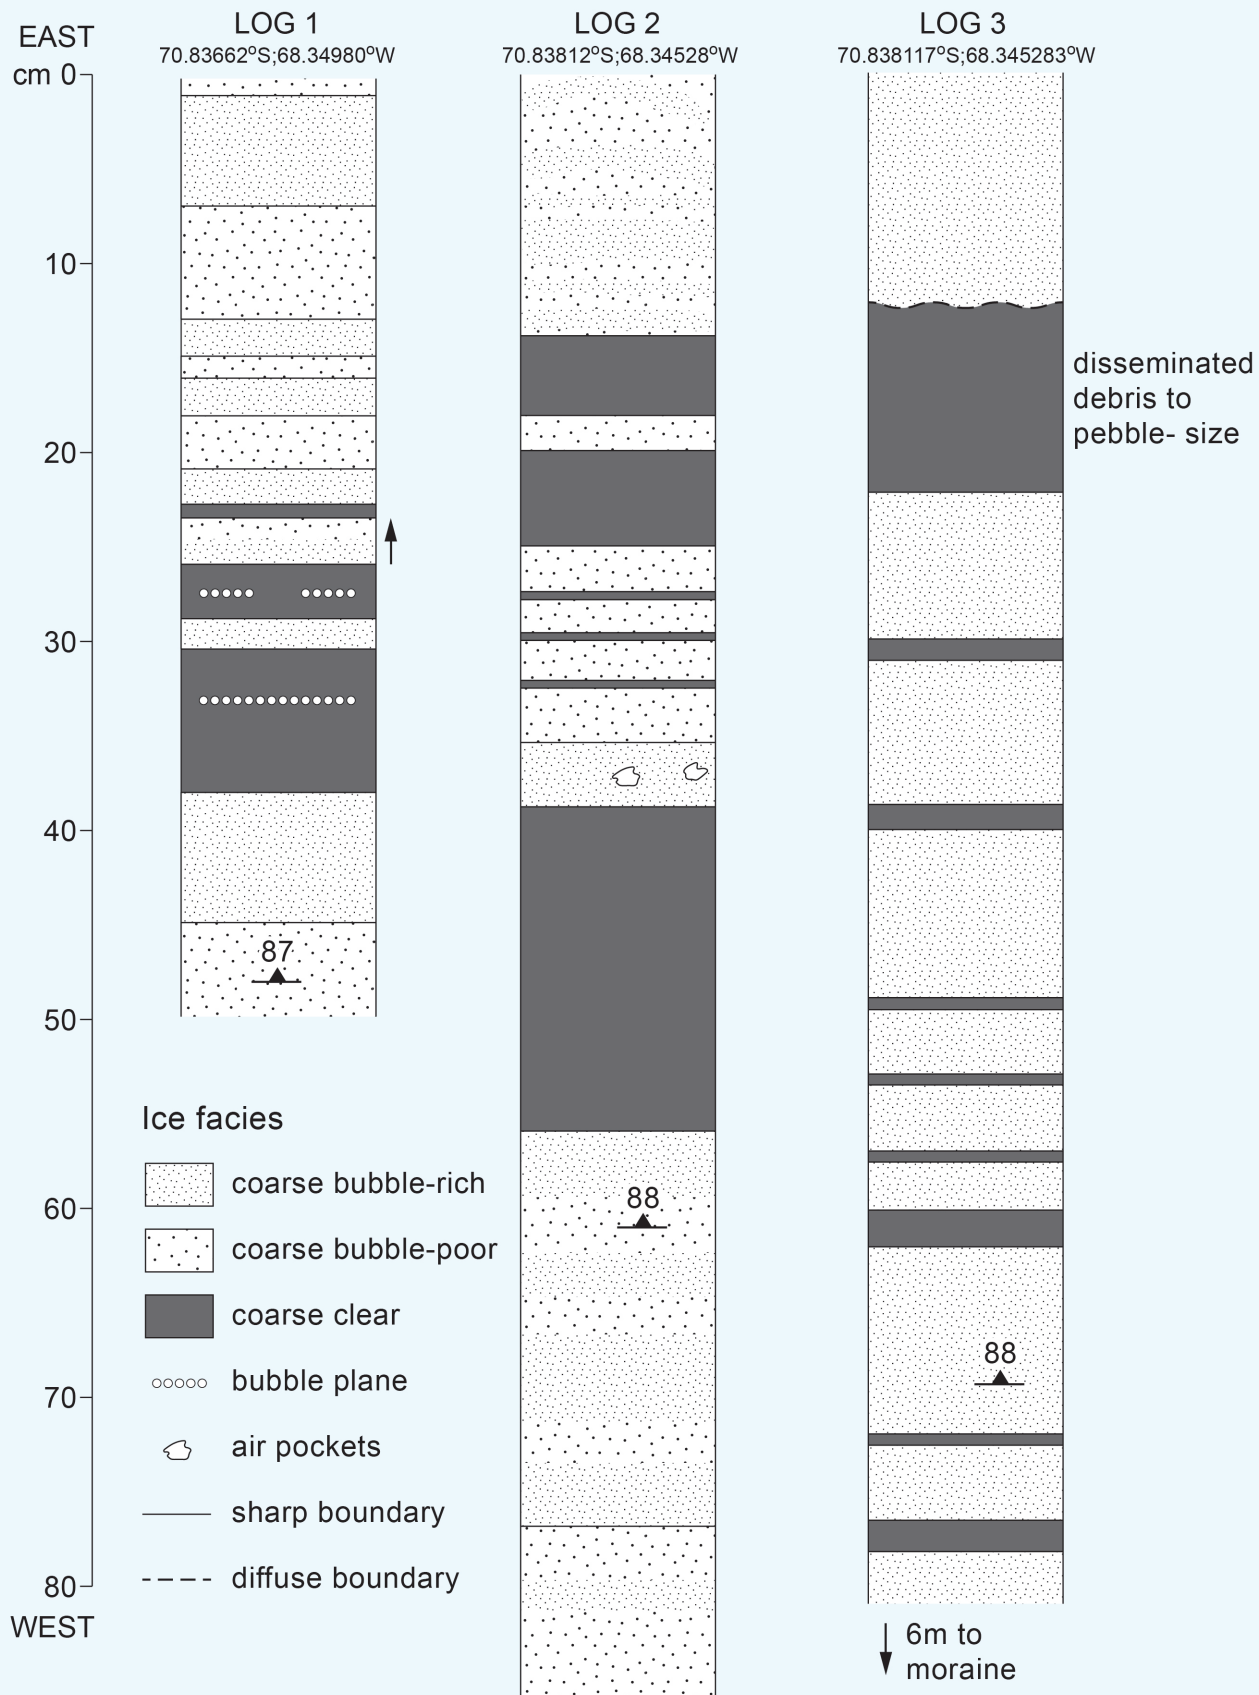

Logs of ice facies in foliation

Supplement: Supplementary file 5 [file 1]
